# Supplementary material
Source: publisher figshare collection journal article supplement (https://future-science-group.figshare.com/ndownloader/files/31419613)
Supplement: Supplementary file 1 [file 31419613]

**Supplementary Table 1. The reasons for dose reduction**

| **Adverse events** | **N=16** |
| --- | --- |
| Anorexia, N (%) | 6 (38%) |
| Acneiform rash, N (%) | 4 (25%) |
| Pneumonitis, N (%) | 2 (13%) |
| Diarrhea, N (%) | 2 (13%) |
| White blood cell decreased, N (%) | 1 (6%) |
| Platelet count decreased, N (%) | 1 (6%) |
